# Supplementary material for: Evaluation of the Hepa Wash®treatment in pigs with acute liver failure
Source: Springer Nature journal article supplement (doi:10.1186/1471-230x-13-83), 2013-05-13

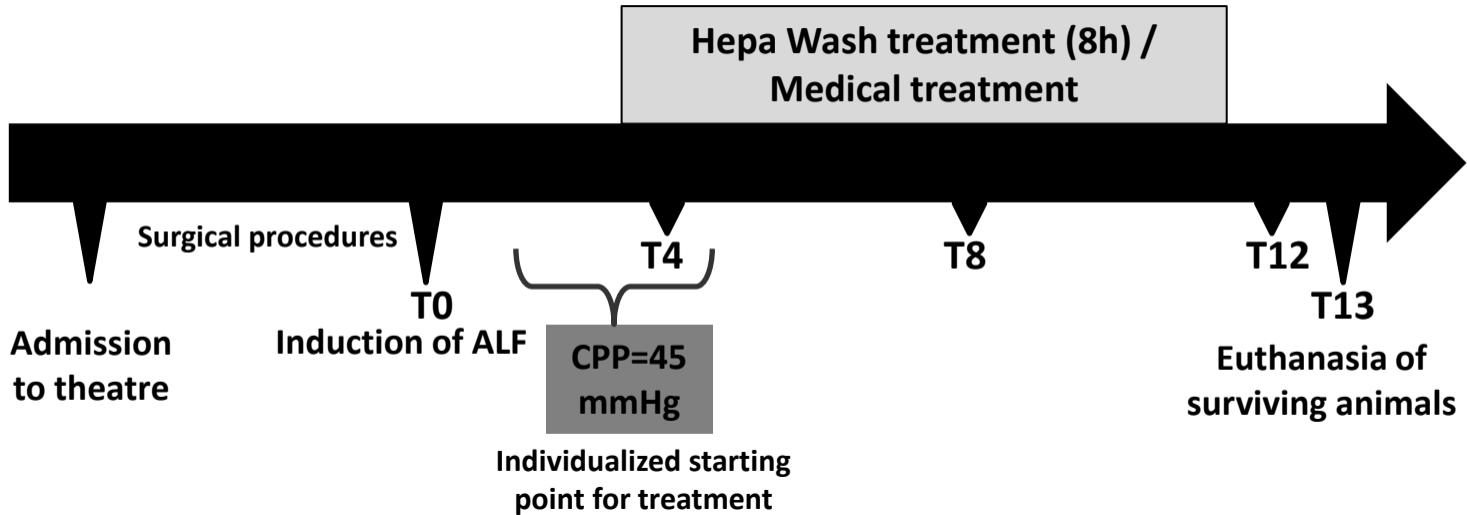

Supplement: 12876_2012_944_MOESM2_ESM.pdf [file 12876_2012_944_MOESM2_ESM.pdf]
